# Supplementary material
Source: PubMed Central journal article supplement (PMC5298203)
Supplement: NIHMS846584-supplement-Online_Supplement.pdf [file NIHMS846584-supplement-Online_Supplement.pdf]

1 Online-Only Supplemental Materials

2 eTable 1. Demographics for ASD-Enriched Samples

3 eTable 2. SRS-2 Subscale Scores in Children with NF1; Comparison to Norms and  
4 Idiopathic ASD

5 eTable 3. Score Profile of SRS-2 and Conners Subscales for Individuals with Above-  
6 Threshold Quantitative ASD Scores

7 eTable 4. Exploratory Factor Analysis (Excluding ASD-Enriched NF1 Sample) –  
8 Eigenvalues for Extracted Components

9 eTable 5. Exploratory Factor Analysis Including ASD-Enriched NF1 Sample and Simons  
10 Simplex Collection (SSC)

11 eTable 6. Fit Indices for 1-6 Class Mixture Models using Empirically-Derived SRS  
12 Factors

13  
14 eTable 7. Family Relationship of First Degree Relative Pairings Concordantly Affected  
15 by NF1

16 eFigure 1. Standardized Quantitative Trait Distribution for ASD – Restricted Sample

17 eFigure 2. Receiver Operating Characteristics (ROC) Curves Comparing the  
18 Performance of the Principal Factor Score and SRS-2 Total T-Score in Identifying  
19 Categorical Diagnoses of ASD

20 eFigure 3. Empirically-Derived SRS-2 Factor Scores by Latent Classes

21 eFigure 4. Within-Individual Correlation of Intelligence and Quantitative Autistic Trait  
22 Scores

23 eMethods – Mixture Model

24

25

26

27

28

29

30

31

32 **eTable 1. Demographics for ASD-Enriched Samples**

| <b>Recruitment Population</b>    | Single sample recruited from an outpatient genetics clinic and via advertisements for participation in a clinical trial for children with NF1 and ASD. | Simons Simplex Collection <sup>b</sup> |
|----------------------------------|--------------------------------------------------------------------------------------------------------------------------------------------------------|----------------------------------------|
| <b>ASD Instrument</b>            | SRS, SRS-2                                                                                                                                             | SRS                                    |
| <b>Sample Size</b>               | 79                                                                                                                                                     | 2418                                   |
| <b>Median Age, years (range)</b> | 7.0 (4.0 – 13.0)                                                                                                                                       | 8.4 (4.0 – 18.0)                       |
| <b>Males (%)</b>                 | 49 (62.0)                                                                                                                                              | 2114 (87.4)                            |
| <b>Females (%)</b>               | 30 (38.0)                                                                                                                                              | 304 (12.6)                             |
| <b>Age &lt; 18 years (%)</b>     | 79 (100.0)                                                                                                                                             | 2417 (>99.9)                           |
| <b>Age ≥18 years (%)</b>         | 0 (0.0)                                                                                                                                                | 1 (<0.01)                              |
| <b>Sporadic Transmission (%)</b> | 17 (21.5) <sup>a</sup>                                                                                                                                 | 2418 (100.0)                           |
| <b>Familial Transmission (%)</b> | 33 (31.8) <sup>a</sup>                                                                                                                                 | 0 (0.0)                                |
| <b>Mean SRS T-Score (SD)</b>     | 78.59 (14.51)                                                                                                                                          | 79.59 (10.39)                          |
| <b>SRS-2 score ≥60 (%)</b>       | 70 (88.6)                                                                                                                                              | 2307 (95.4)                            |
| <b>SRS-2 score ≥70 (%)</b>       | 57 (72.2)                                                                                                                                              | 1991 (82.3)                            |
| <b>SRS-2 score ≥75 (%)</b>       | 55 (69.6)                                                                                                                                              | 1731 (71.6)                            |

33 <sup>a</sup>Total does not equal 100% due to presence of unknown values34 <sup>b</sup>References: Frazier TW, Hardan AY. Equivalence of symptom dimensions in females and males with autism. *Autism*. 2016; Aug 7  
35 [Epub ahead of print]; Frazier TW, Georgiades S, Bishop SL, Hardan AY. Behavioral and cognitive characteristics of females and  
36 males with autism in the Simons Simplex Collection. *J Am Acad Child Adolesc Psychiatry*. 2014; 53(3):329-340.

37

38

39

40

41

42

43

44

45

46 **eTable 2. SRS-2 Subscale Scores in Children with NF1; Comparison to Norms and**  
 47 **Idiopathic ASD**

| Parent-Report SRS-2 for Boys (<18 years)            | Standardization Sample <sup>a</sup> |      | NF1 Sample (n=208) |          |        | Simons Simplex Collection (n=2114) <sup>b</sup> |          |        |
|-----------------------------------------------------|-------------------------------------|------|--------------------|----------|--------|-------------------------------------------------|----------|--------|
|                                                     | Raw Mean                            | SD   | T-Score of Mean    | Raw Mean | Raw SD | T-Score of Mean                                 | Raw Mean | Raw SD |
| Social Awareness                                    | 5.69                                | 3.18 | 59.3               | 8.69     | 4.22   | 71.5                                            | 12.53    | 3.63   |
| Social Cognition                                    | 6.15                                | 5.38 | 59.6               | 11.38    | 7.84   | 73.0                                            | 18.52    | 5.62   |
| Social Communication                                | 10.79                               | 9.11 | 60.0               | 19.92    | 13.17  | 74.3                                            | 33.32    | 9.14   |
| Social Motivation                                   | 5.95                                | 4.87 | 56.9               | 9.30     | 6.20   | 68.7                                            | 14.73    | 5.67   |
| DSM-5 Social Communication and Interaction          | 28.6                                | 20.2 | 60.3               | 49.28    | 29.19  | 75.0                                            | 79.10    | 21.41  |
| DSM-5 Repetitive Behaviors and Restricted Interests | 5.02                                | 5.67 | 61.0               | 11.18    | 8.12   | 74.1                                            | 18.67    | 6.76   |
| SRS Total Score                                     | 33.6                                | 25.2 | 60.5               | 60.46    | 36.36  | 78.9                                            | 97.77    | 26.79  |
| Parent-Report SRS-2 for Girls (<18 years)           | Standardization Sample <sup>a</sup> |      | NF1 Sample (n=212) |          |        | Simons Simplex Collection (n=304) <sup>b</sup>  |          |        |
|                                                     | Raw Mean                            | SD   | T-Score of Mean    | Raw Mean | Raw SD | T-Score of Mean                                 | Raw Mean | Raw SD |
| Social Awareness                                    | 5.10                                | 3.21 | 58.1               | 7.73     | 3.85   | 74.2                                            | 12.80    | 3.65   |
| Social Cognition                                    | 5.39                                | 5.13 | 57.3               | 9.24     | 6.53   | 77.3                                            | 19.27    | 5.24   |
| Social Communication                                | 8.98                                | 8.71 | 57.4               | 15.49    | 10.53  | 79.6                                            | 34.59    | 9.61   |
| Social Motivation                                   | 5.39                                | 4.57 | 55.3               | 7.82     | 5.34   | 71.2                                            | 15.21    | 5.82   |
| DSM-5 Social Communication and Interaction          | 24.9                                | 19.4 | 57.8               | 40.28    | 23.65  | 79.0                                            | 81.87    | 20.64  |
| DSM-5 Repetitive Behaviors and Restricted Interests | 4.13                                | 4.94 | 59.0               | 8.52     | 6.76   | 78.8                                            | 18.83    | 7.08   |
| SRS Total Score                                     | 29.0                                | 23.7 | 58.2               | 48.80    | 29.31  | 84.2                                            | 100.69   | 26.49  |

48 SD: Standard Deviation  
 49 <sup>a</sup>Constantino JN, Gruber CP. Social Responsiveness Scale, Second Edition. Los Angeles, CA: Western Psychological Services;  
 50 2012. Mean T-scores for all domains and total scores of the standardization sample are 50.0 with a standard deviation of 10.0.  
 51 <sup>b</sup>For comparison purposes, raw score mean and standard deviation with corresponding T-scores of SRS-2 subscales for affected  
 52 probands from the Simons Simplex Collection (SSC) are included; n=2418. Eigenvalues and highest-loading factors on the first  
 53 principal component generated from unweighted least squares exploratory factor analysis for the SSC are reported in eTable 5C &  
 54 5D.  
 55

56 **eTable 3. Score Profile of SRS-2 and Conners Subscales for Individuals for**  
 57 **Above-Threshold Quantitative ASD Scores**

| ASD T-Scores (n=70)                          | Mean (SD)     | Minimum | Maximum |
|----------------------------------------------|---------------|---------|---------|
| Social Awareness                             | 76.34 (10.71) | 55      | 104     |
| Social Cognition                             | 81.97 (7.87)  | 65      | 100     |
| Social Communication                         | 82.04 (9.26)  | 65      | 105     |
| Social Motivation                            | 74.93 (10.66) | 56      | 108     |
| Social Communication and Interaction         | 82.96 (8.15)  | 73      | 107     |
| Restricted Interest and Repetitive Behaviors | 81.84 (9.14)  | 62      | 102     |
| SRS-2 Total                                  | 83.69 (7.99)  | 75      | 108     |
| ADHD T-Scores (n=36)                         | Mean (SD)     | Minimum | Maximum |
| Inattentive                                  | 77.25 (10.37) | 55      | 90      |
| Hyperactivity                                | 79.03 (11.34) | 48      | 90      |
| ADHD Index                                   | 79.41 (9.76)  | 54      | 90      |

58 SD: Standard Deviation

59 **eTable 4. Exploratory Factor Analysis (Excluding ASD-Enriched NF1 Sample) -**  
 60 **Eigenvalues for Extracted Components**

| Factor | Initial Eigenvalues |               | Cumulative % | Rotation Sum of Squared Loadings |
|--------|---------------------|---------------|--------------|----------------------------------|
|        | Total               | % of Variance |              |                                  |
| 1      | 20.084              | 30.898        | 30.898       | 15.406                           |
| 2      | 3.190               | 4.908         | 35.806       | 10.218                           |
| 3      | 2.587               | 3.980         | 39.785       | 12.348                           |
| 4      | 1.825               | 2.808         | 42.593       | 10.860                           |
| 5      | 1.399               | 2.153         | 44.746       | 10.980                           |
| 6      | 1.367               | 2.103         | 46.849       | 5.914                            |
| 7      | 1.284               | 1.976         | 48.825       | 10.097                           |
| 8      | 1.215               | 1.869         | 50.693       | 8.345                            |
| 9      | 1.140               | 1.755         | 52.448       | 5.834                            |
| 10     | 1.131               | 1.740         | 54.188       | 6.748                            |
| 11     | 1.074               | 1.652         | 55.840       | 12.092                           |
| 12     | 1.028               | 1.581         | 57.421       | 3.833                            |
| 13     | 1.012               | 1.556         | 58.977       | 1.233                            |

61

62

63 **eTable 5. Exploratory Factor Analysis Including ASD-Enriched NF1 Sample and**  
 64 **Simons Simplex Collection (SSC)**

65

66 **(A) Eigenvalues for Extracted Components – NF1 Sample**

| Factor | Initial Eigenvalues |               | Cumulative % | Rotation Sum of Squared Loadings |
|--------|---------------------|---------------|--------------|----------------------------------|
|        | Total               | % of Variance |              |                                  |
| 1      | 22.274              | 34.267        | 34.267       | 19.067                           |
| 2      | 3.021               | 4.648         | 38.915       | 12.682                           |
| 3      | 2.457               | 3.780         | 42.694       | 11.501                           |
| 4      | 1.809               | 2.783         | 45.478       | 9.169                            |
| 5      | 1.361               | 2.094         | 47.572       | 11.847                           |
| 6      | 1.292               | 1.988         | 49.560       | 8.327                            |
| 7      | 1.193               | 1.835         | 51.395       | 11.203                           |
| 8      | 1.162               | 1.788         | 53.182       | 11.759                           |
| 9      | 1.089               | 1.675         | 54.857       | 9.068                            |
| 10     | 1.031               | 1.586         | 56.443       | 6.889                            |
| 11     | 1.021               | 1.571         | 58.014       | 8.696                            |

67

68

69

70

71 **(B) Item Loadings on First Principal Component – NF1 Sample**

| Item                                                | Domain | Loading |
|-----------------------------------------------------|--------|---------|
| Doesn't know when others take advantage             | SCI    | .806    |
| Wanders aimlessly, one activity to another          | SCI    | .780    |
| Literal, doesn't get the real meaning               | SCI    | .776    |
| Trouble keeping up with conversations               | SCI    | .685    |
| Clings to adults, seems too dependent               | SCI    | .683    |
| Walks between two people who are talking            | SCI    | .666    |
| Is not physically well coordinated                  | RRB    | .619    |
| Problems understanding cause and effect             | SCI    | .594    |
| Does extremely well at a few tasks, but not at most | RRB    | .591    |
| Talks around the subject                            | SCI    | .507    |
| Is too silly or laughs inappropriately              | SCI    | .506    |

72 SCI: Social Communication and Interaction; RRB: Restricted Interests and Repetitive Behaviors

73  
74 **(C) Eigenvalues for Extracted Components – SSC**

| Factor | Total  | Initial Eigenvalues | Cumulative % | Rotation Sum of Squared Loadings |
|--------|--------|---------------------|--------------|----------------------------------|
|        |        | % of Variance       |              |                                  |
| 1      | 13.060 | 20.093              | 20.093       | 5.410                            |
| 2      | 3.950  | 6.077               | 26.170       | 6.520                            |
| 3      | 2.645  | 4.070               | 30.240       | 6.687                            |
| 4      | 2.190  | 3.369               | 33.609       | 6.337                            |
| 5      | 1.801  | 2.770               | 36.379       | 7.743                            |
| 6      | 1.642  | 2.526               | 38.905       | 7.495                            |
| 7      | 1.560  | 2.400               | 41.305       | 7.405                            |
| 8      | 1.406  | 2.163               | 43.468       | 3.868                            |
| 9      | 1.267  | 1.949               | 45.416       | 2.405                            |
| 10     | 1.152  | 1.772               | 47.189       | 5.483                            |
| 11     | 1.080  | 1.661               | 48.850       | 2.142                            |

75  
76 **(D) Item Loadings on First Principal Component – SSC**

| Item                                                                                     | Domain | Loading |
|------------------------------------------------------------------------------------------|--------|---------|
| Responds appropriately to mood changes in others                                         | SCI    | .607    |
| Offers comfort to others when they are sad                                               | SCI    | .576    |
| Is aware of what others are thinking and feeling                                         | SCI    | .565    |
| Is able to understand the meaning of other people's tone of voice and facial expressions | SCI    | .444    |
| Has a sense of humor, understands jokes                                                  | SCI    | .410    |
| Is able to imitate others' actions                                                       | SCI    | .404    |
| Recognizes when something is unfair                                                      | SCI    | .389    |
| Is able to communicate his or her feelings to others                                     | SCI    | .381    |
| Is imaginative, good at pretending (without losing touch with reality)                   | SCI    | .349    |
| Focuses his or her attention to where others are looking or listening                    | SCI    | .311    |
| Knows when he or she is talking too loud or making too much noise                        | SCI    | .247    |

77 SCI: Social Communication and Interaction; RRB: Restricted Interests and Repetitive Behaviors

78  
79  
80  
81

82 **eTable 6. Fit Indices for 1-6 Class Mixture Models using Empirically-Derived SRS**  
 83 **Factors**

84

| Class # | Par | LL       | AIC  | BIC  | saBIC | $\Delta$ BIC | Entropy |
|---------|-----|----------|------|------|-------|--------------|---------|
| 1-class | 20  | -1829.61 | 3699 | 3788 | 3724  |              |         |
| 2-class | 26  | -1730.22 | 3512 | 3628 | 3545  | -160         | 0.910   |
| 3-class | 32  | -1673.45 | 3411 | 3553 | 3451  | -75          | 0.896   |
| 4-class | 38  | -1635.51 | 3347 | 3515 | 3395  | -37          | 0.865   |
| 5-class | 44  | -1608.41 | 3305 | 3500 | 3360  | -16          | 0.887   |
| 6-class | 50  | -1602.98 | 3306 | 3527 | 3369  | 28           | 0.840   |

85 Par=number of estimated parameters, LL=Log-likelihood, AIC=Akaike Information Criterion, BIC=Bayesian Information Criterion,  
 86 saBIC=sample-size adjusted Bayesian Information Criterion.

87  
 88  
 89  
 90  
 91  
 92  
 93  
 94  
 95  
 96  
 97  
 98  
 99  
 100  
 101  
 102  
 103  
 104  
 105  
 106

107 **eTable 7. Family Relationship of First Degree Relative Pairings Concordantly**  
 108 **Affected by NF1**

|    | 1 <sup>st</sup> Affected Family Member |             |              | 2 <sup>nd</sup> Affected Family Member |             |              | Site |
|----|----------------------------------------|-------------|--------------|----------------------------------------|-------------|--------------|------|
|    | Sex (Male/Female)                      | Age (years) | Relationship | Sex (Male/Female)                      | Age (years) | Relationship |      |
| 1  | M                                      | 8           | Son          | F                                      | 25          | Mother       | WUSM |
| 2  | M                                      | 11          | Brother      | F                                      | 8           | Sister       | WUSM |
| 3  | F                                      | 19          | Twin Sister  | F                                      | 19          | Twin Sister  | WUSM |
| 4  | F                                      | 15          | Sister       | F                                      | 12          | Sister       | WUSM |
| 5  | M                                      | 10          | Son          | F                                      | 33          | Mother       | WUSM |
| 6  | F                                      | 12          | Sister       | F                                      | 8           | Sister       | WUSM |
| 7  | M                                      | 13          | Son          | F                                      | 36          | Mother       | WUSM |
| 8  | F                                      | 23          | Daughter     | M                                      | 58          | Father       | WUSM |
| 9  | F                                      | 11          | Sister       | M                                      | 3           | Brother      | WUSM |
| 10 | F                                      | 6           | Daughter     | F                                      | 28          | Mother       | WUSM |
| 11 | M                                      | 19          | Son          | F                                      | 49          | Mother       | WUSM |
| 12 | F                                      | 9           | Daughter     | M                                      | 40          | Father       | WUSM |
| 13 | F                                      | 5           | Daughter     | F                                      | 35          | Mother       | WUSM |
| 14 | F                                      | 16          | Daughter     | F                                      | 51          | Mother       | WUSM |
| 15 | M                                      | 24          | Brother      | M                                      | 13          | Brother      | WUSM |
| 16 | M                                      | 5           | Son          | M                                      | 31          | Father       | WUSM |
| 17 | F                                      | 11          | Daughter     | M                                      | 49          | Father       | WUSM |
| 18 | M                                      | 10          | Son          | M                                      | 57          | Father       | WUSM |
| 19 | F                                      | 44.5        | Daughter     | F                                      | 83.9        | Mother       | UCSF |
| 20 | M                                      | 9           | Son          | M                                      | 41          | Father       | UCSF |
| 21 | M                                      | 2.7         | Son          | F                                      | 29.5        | Mother       | UCSF |
| 22 | F                                      | 29.8        | Daughter     | F                                      | 52.5        | Mother       | UCSF |
| 23 | F                                      | 3.4         | Daughter     | F                                      | 34.6        | Mother       | UCSF |
| 24 | F                                      | 9.7         | Daughter     | F                                      | 31          | Mother       | UCSF |
| 25 | M                                      | 12          | Brother      | F                                      | 15          | Sister       | UCSF |
| 26 | F                                      | 12          | Twin Sister  | F                                      | 12          | Twin Sister  | UCSF |
| 27 | F                                      | 10          | Sister       | F                                      | 9           | Sister       | UM   |
| 28 | F                                      | 8           | Sister       | F                                      | 11          | Sister       | UM   |
| 29 | M                                      | 11          | Brother      | F                                      | 14          | Sister       | UM   |
| 30 | F                                      | 10          | Sister       | F                                      | 8           | Sister       | UM   |
| 31 | M                                      | 11          | Brother      | M                                      | 13          | Brother      | UM   |
| 32 | F                                      | 6           | Sister       | F                                      | 10          | Sister       | UM   |
| 33 | M                                      | 11          | Brother      | F                                      | 12          | Sister       | UM   |
| 34 | F                                      | 11          | Sister       | F                                      | 8           | Sister       | UM   |
| 35 | F                                      | 9           | Sister       | F                                      | 6           | Sister       | UM   |
| 36 | F                                      | 9           | Sister       | M                                      | 6           | Brother      | UM   |
| 37 | M                                      | 5.9         | Brother      | M                                      | 10          | Brother      | UM   |
| 38 | F                                      | 7           | Sister       | M                                      | 12          | Brother      | CNHS |
| 39 | F                                      | 16          | Twin Sister  | F                                      | 16          | Twin Sister  | CNHS |

109 WUSM: Washington University School of Medicine; UCSF: University of California – San Francisco; UM: The University of  
 110 Manchester; CNHS: Children’s National Health System

111

112

113

114 **eFigure 1. Standardized Quantitative Trait Distribution for ASD – Restricted**  
 115 **Sample**

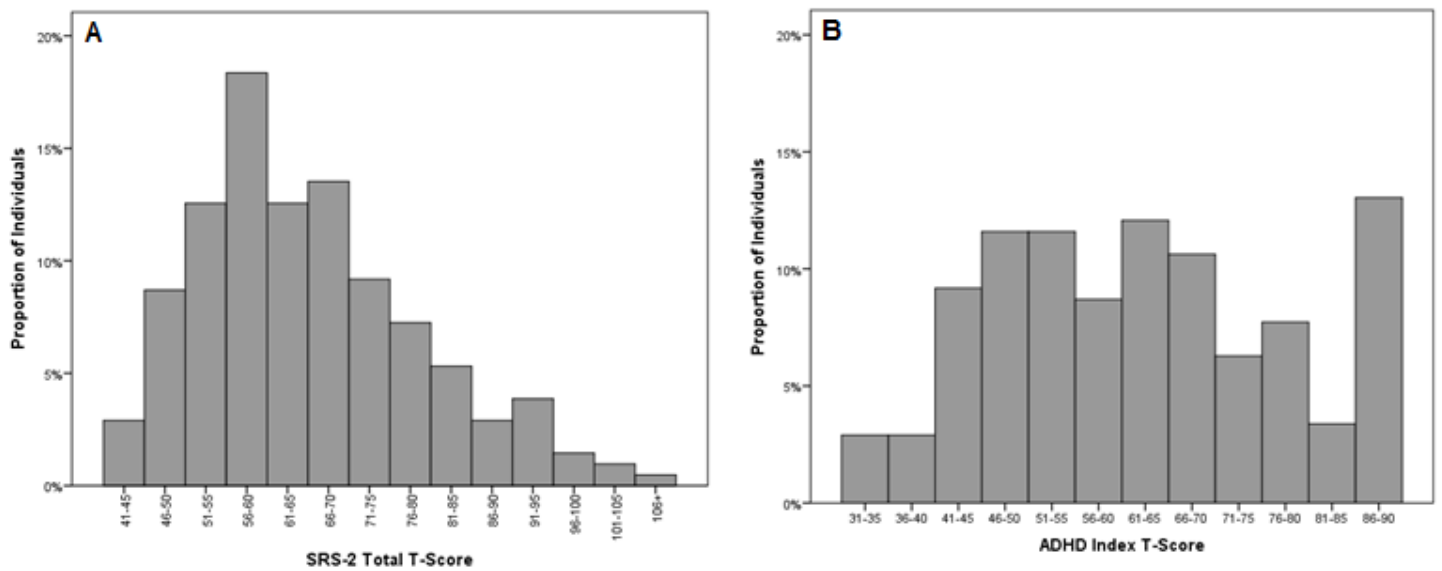

116 Distribution of SRS-2 Total T-scores (A) and ADHD Index T-scores (B) for individuals with available ADHD data (n=207)

117

118

119

120

121

122

123

124

125

126

127

128

129



130 **eFigure 2. Receiver Operating Characteristics (ROC) Curves Comparing the**  
 131 **Performance of the Principal Factor Score and SRS-2 Total T-Score in Identifying**  
 132 **Categorical Diagnoses of ASD**

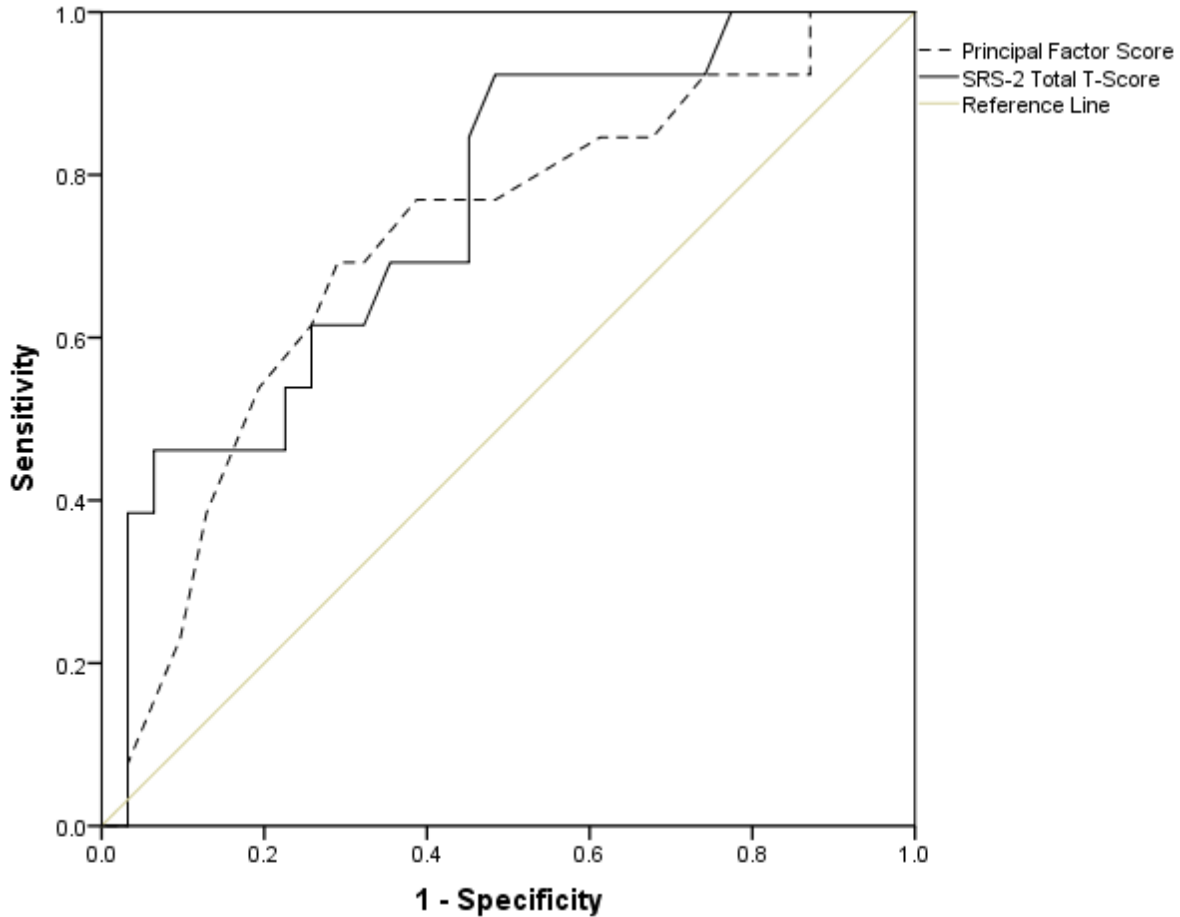

133  
 134 As observed in previous studies of the SRS-2, preservation of a higher proportion of the instrument's items (SRS-2 Total T-Score;  
 135 solid line) outweighs advantages of the reduction in informant burden (constraining data acquisition to a single principal factor –  
 136 Principal Factor Score; dotted line) when sensitivity and specificity are concerned. We note, also, that ASD case assignment within  
 137 any ASD-associated monogenic syndrome could be expected to erode ROC characteristics from the ideal, especially when all or  
 138 most patients bear some degree of elevated symptom burden for the discriminating characteristic or test (i.e. relative absence of  
 139 true "normal"). Thus, in NF1, when ASD classification is made on the basis of diagnostic assessments validated exclusively for  
 140 idiopathic ASD, we would expect less robust prediction from trait or symptom counts than would typically be observed when  
 141 distinguishing idiopathic ASD from the normal distribution of such traits in the general population.

142  
 143  
 144  
 145  
 146  
 147  
 148

**eFigure 3. Empirically-Derived SRS-2 Factor Scores by Latent Classes**

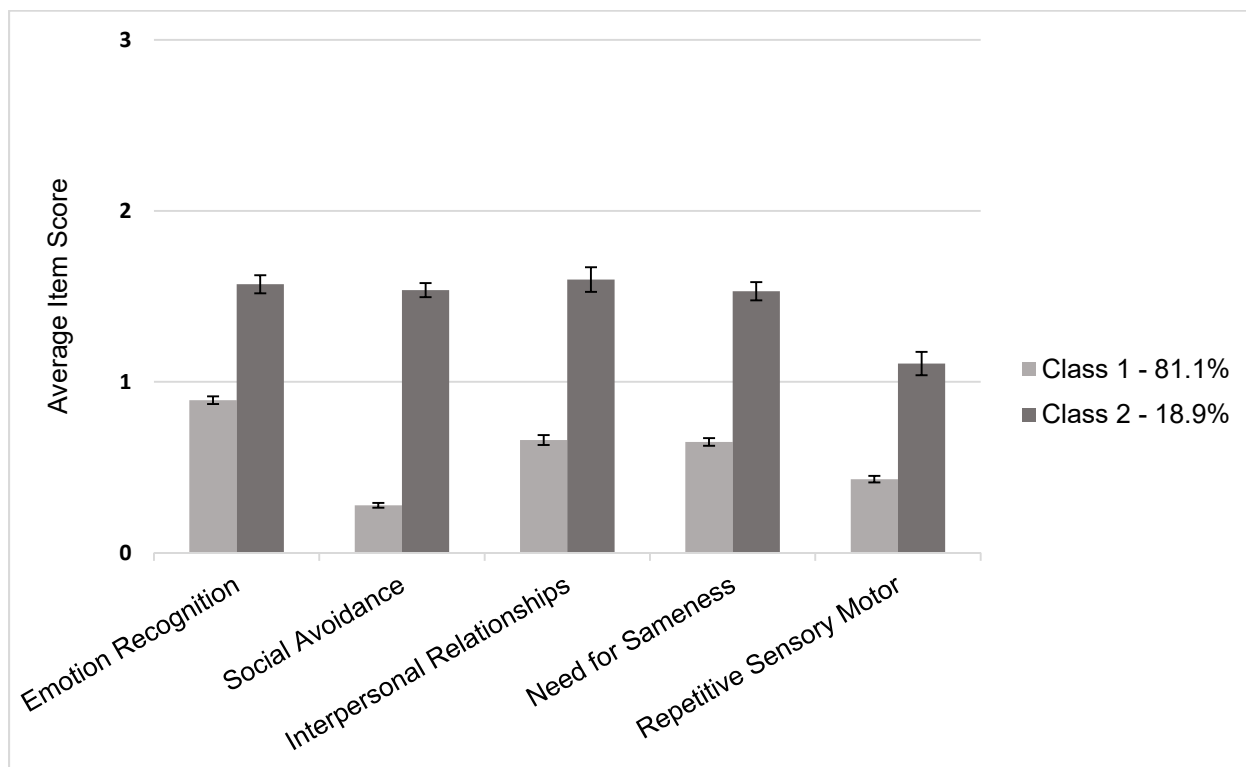

150

151 Empirically-derived mean scores and standard error stratified by latent classes for all five SRS-2 factors. A uniform elevation in  
152 average item score for Class 2 (dark bars) is observed relative to Class 1 (light bars) representing the full range of autistic  
153 symptoms across both criterion domains of social communication and interaction, and restricted interests and repetitive behaviors.

154

155

156

157

158

159

160

161

162

163

164

165 **eFigure 4. Within-Individual Correlation of Intelligence and Quantitative Autistic**  
166 **Trait Scores**

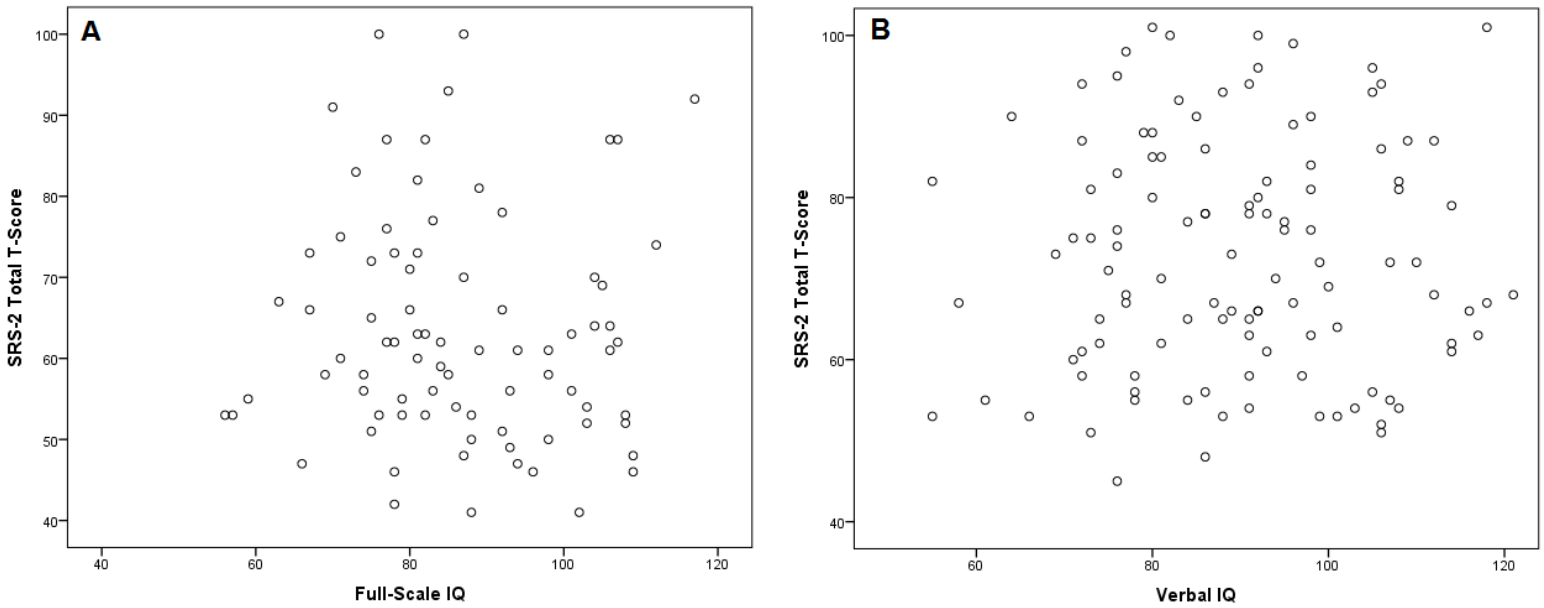

167

168 A) Correlation between Full-Scale IQ (x-axis) and SRS-2 Total T-Score (y-axis); Pearson correlation coefficient,  $r = -0.06$ . (n=81 of  
169 531; 15.2% of total sample). B) Correlation between Verbal IQ (x-axis) and SRS-2 Total T-Score (y-axis); Pearson correlation  
170 coefficient,  $r = 0.01$ . (n=112 of 531; 21.1% of total sample).

171

172

173 **eMethods**

174

175 **Mixture Model**

176 Using empirically-derived SRS factors, a series of mixture models were estimated with 1-6 latent classes specified.<sup>25</sup>  
177 Each model permitted nuisance covariance between SRS indicators. Model fit was estimated using the Akaike  
178 Information Criterion (AIC), Bayesian Information Criterion (BIC), sample-size adjusted Bayesian Information  
179 Criterion (saBIC), and classification entropy.<sup>26,27</sup> Change in BIC from n to n-1 classes was evaluated to identify the  
180 number of classes that resulted in the greatest improvement in fit. Two separate hierarchical regression models were  
181 estimated to examine whether empirical classifications were predominantly due to ASD or ADHD symptomatology.  
182 In both models, age was entered in the first step to adjust for age-differences observed between classes. In steps 2  
183 and 3, ASD or ADHD symptom scores were entered in alternating fashion to estimate specific and common  
184 variance associated with these predictors of empirical classifications.  
185
